# Supplementary material
Source: PubMed Central journal article supplement (PMC4451443)

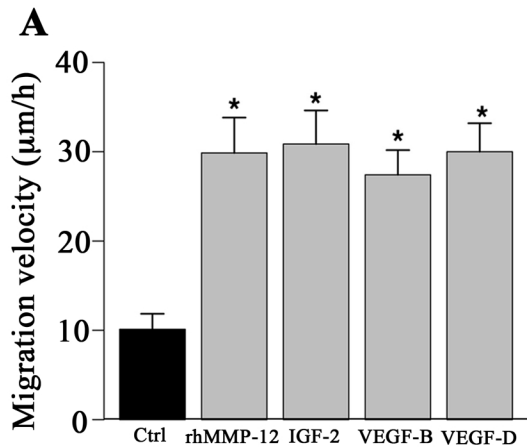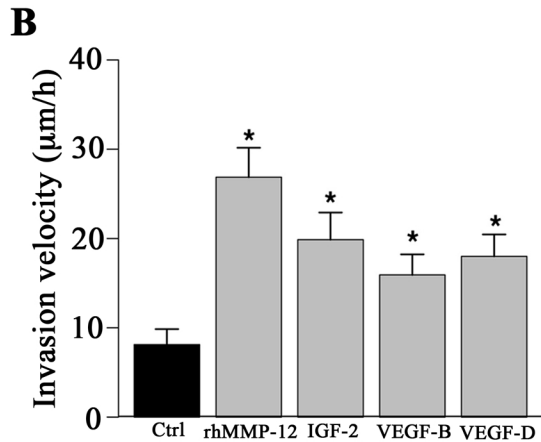

Figure S1

Supplement: NIHMS659069-supplement-suppl_fig_1.pdf [file NIHMS659069-supplement-suppl_fig_1.pdf]

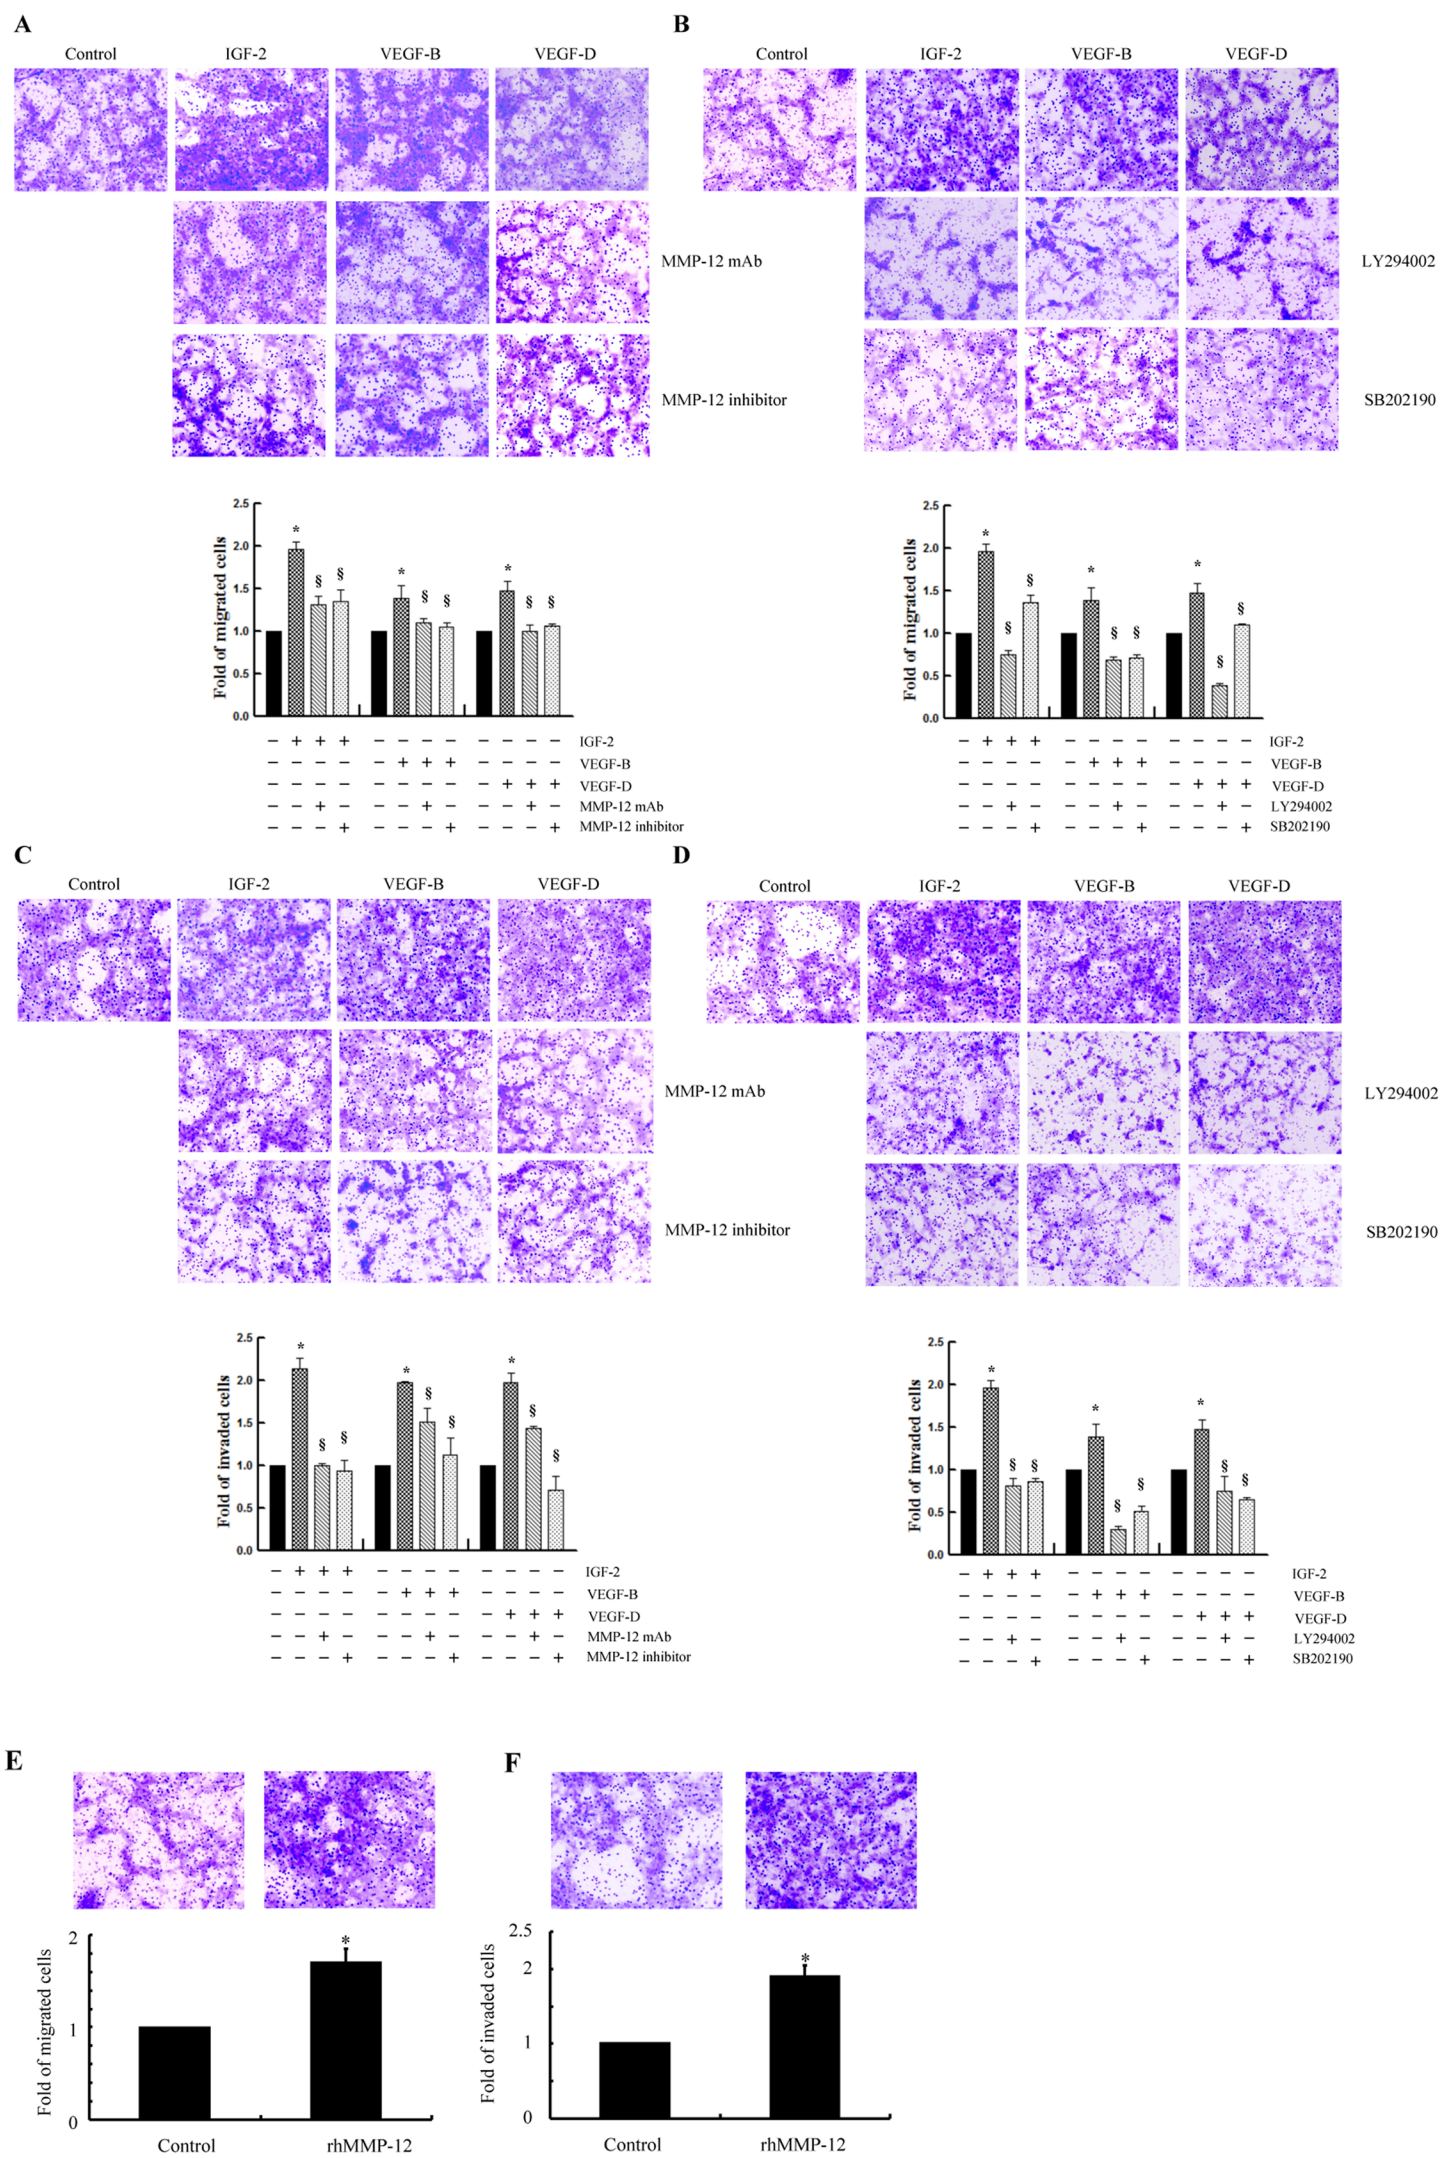

Figure S2

Supplement: NIHMS659069-supplement-suppl_fig_2.pdf [file NIHMS659069-supplement-suppl_fig_2.pdf]
